# Supplementary material
Source: PubMed Central journal article supplement (PMC2730592)
Supplement: NIHMS125911-supplement-1.pdf [file NIHMS125911-supplement-1.pdf]

## SUPPLEMENTARY INFORMATION

### Role of mammalian Mre11 in classical and alternative non-homologous end joining

Anyong Xie, Amy Kwok and Ralph Scully

#### Supplementary Figure 1

**a**

NHEJ reporter sGEJ

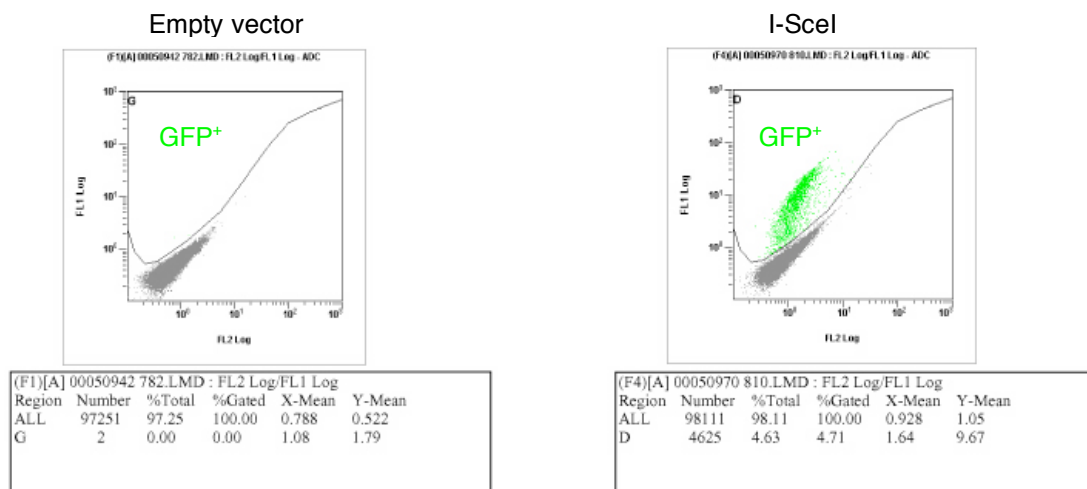

**b**

NHEJ reporter vGEJ

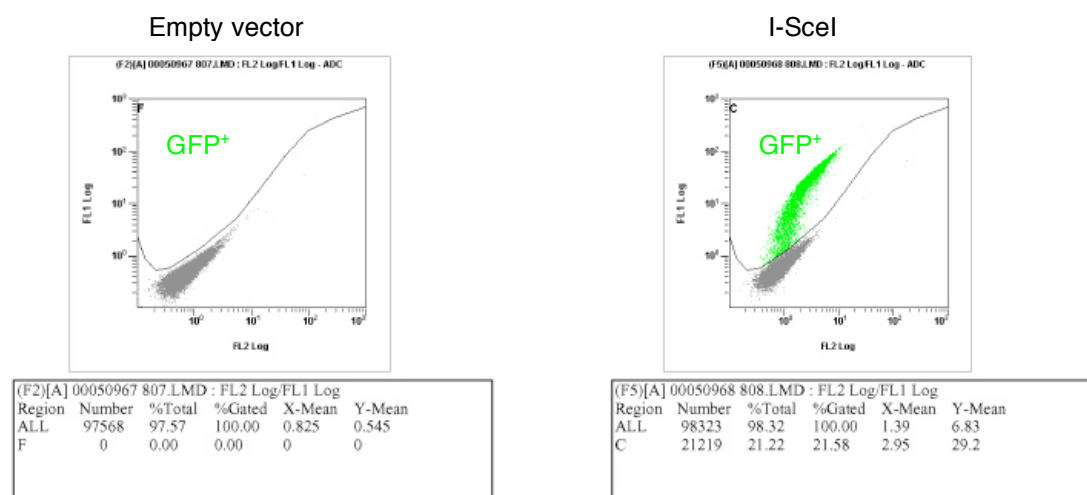

**Supplementary Figure 1** Induction of GFP<sup>+</sup> cells by I-SceI. FACS analysis was performed 3 days after transfection of *Xrcc4*<sup>flax/flax</sup> sGEJ (a) or vGEJ reporter mouse ES cells (b) with empty vector or with an I-SceI plasmid. GFP<sup>+</sup> cells lie above the diagonal, percentages as indicated. FL1 Log: green fluorescence. FL2 Log: red fluorescence.

## Supplementary Figure 2

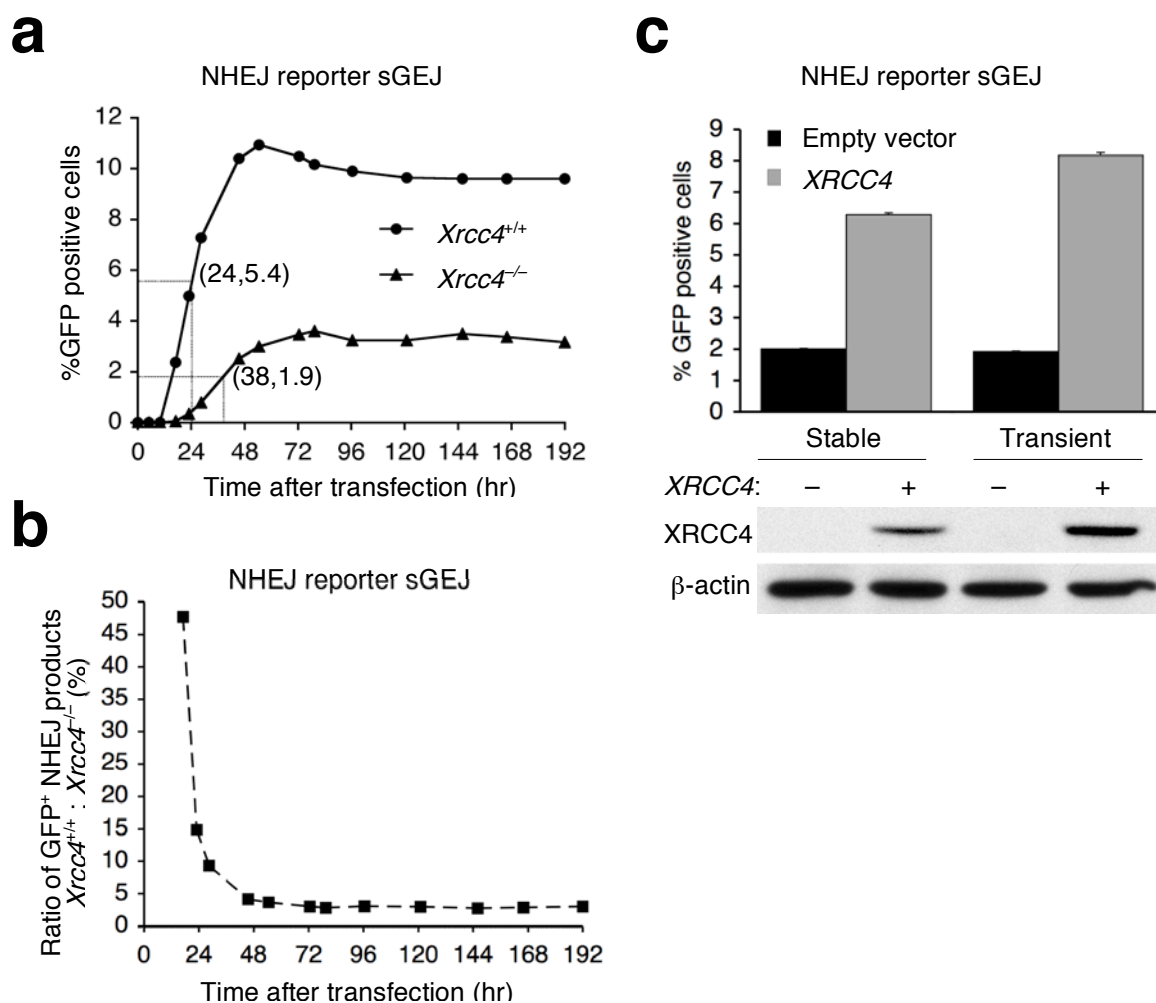

**Supplementary Figure 2** Alternative *Xrcc4*-independent NHEJ acts more slowly. **(a)** I-SceI-induced GFP<sup>+</sup> cells in *Xrcc4*<sup>+/+</sup> versus *Xrcc4*<sup>-/-</sup> sGEJ reporter mouse ES cells, as a function of time following transfection of I-SceI. The time point corresponding to 50% maximal GFP expression is shown in each case. **(b)** Ratio of I-SceI-induced GFP<sup>+</sup> cells in *Xrcc4*<sup>+/+</sup> versus *Xrcc4*<sup>-/-</sup> sGEJ reporter mouse ES cells, as a function of time following transfection of I-SceI. This ratio was calculated from the data shown in **(a)**. **(c)** Percentage of I-SceI-induced GFP<sup>+</sup> cells in *Xrcc4*<sup>-/-</sup> sGEJ reporter mouse ES cells stably or transiently expressing empty vector or wild-type human *XRCC4*. Bars represent the mean of triplicates in a representative experiment. Error bars indicate s.e.m. Student's paired *t*-test (two-tailed) between *XRCC4* versus empty vector,  $P = 0.00027$  for stable and  $P = 0.0001$  for transient. Steady state levels of *XRCC4* protein are shown under the chart with  $\beta$ -actin as a loading control. The data indicates that expression of wild-type human *XRCC4* rescues NHEJ defective in *Xrcc4*<sup>-/-</sup> cells.

### Supplementary Figure 3

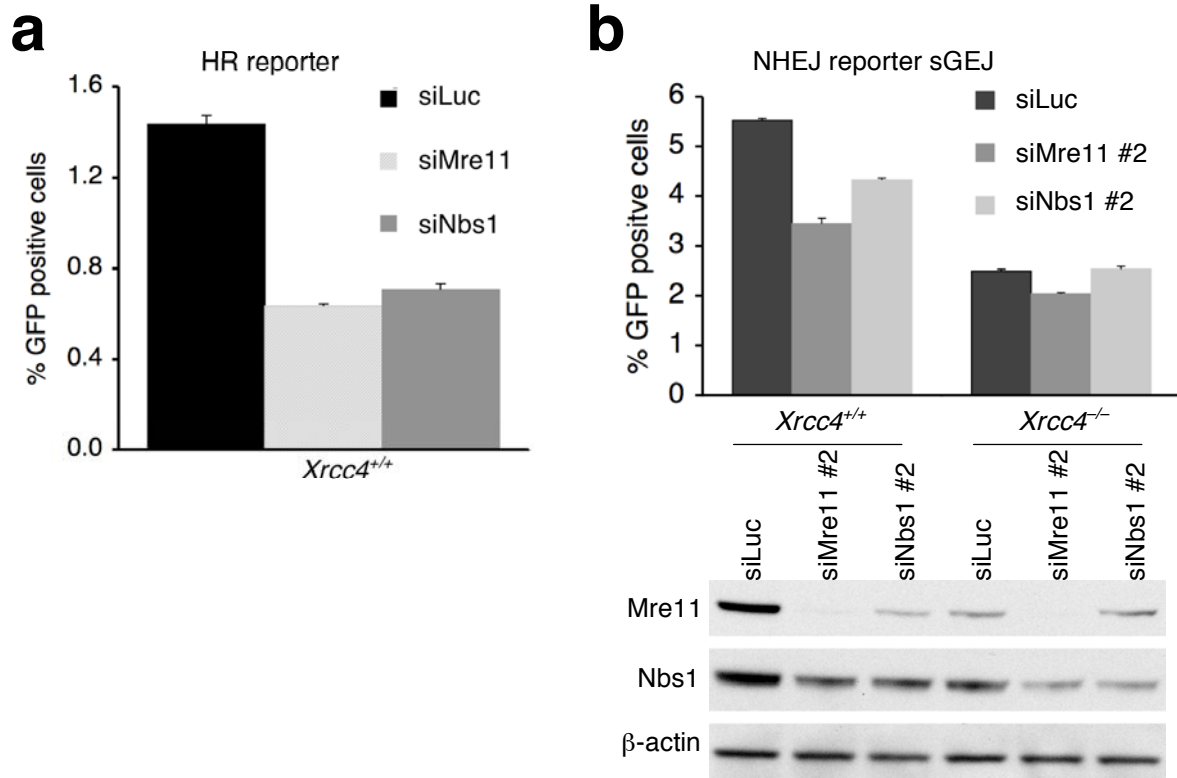

**Supplementary Figure 3** Mre11 regulates HR, *Xrcc4*-dependent NHEJ and *Xrcc4*-independent NHEJ. **(a)** Percentage of I-SceI-induced GFP<sup>+</sup> cells in *XRCC4*<sup>+/+</sup> mouse ES cells containing an HR/SCR reporter and co-transfected with siMre11, siNbs1 or control siLuc. Bars represent the mean of triplicates in a representative experiment. Error bars indicate s.e.m. Student's paired *t*-test (two-tailed): siMre11 *versus* siLuc,  $P = 0.001$ ; siNbs1 *versus* siLuc,  $P = 0.0058$ . **(b)** Percentage of I-SceI-induced GFP<sup>+</sup> cells from *Xrcc4*<sup>+/+</sup> and *Xrcc4*<sup>-/-</sup> sGEJ reporter mouse ES cells depleted of Mre11 or Nbs1 by a second set of siRNA duplex (siMre11: acaggagaagagatcaact; siNbs1: gcagttgaatctaagaaac) with siLuc as a control. Bars represent mean of triplicates. Error bars indicate s.e.m. Student's paired *t*-test (two-tailed): in *Xrcc4*<sup>+/+</sup> cells, siMre11 *versus* siLuc,  $P = 0.0012$ ; siNbs1 *versus* siLuc,  $P = 0.00038$ ; in *Xrcc4*<sup>-/-</sup> cells, siMre11 *versus* siLuc,  $P = 0.0166$ ; siNbs1 *versus* siLuc, not significant ( $P = 0.704$ ). Protein abundance in these siRNA-treated *Xrcc4*<sup>+/+</sup> and *Xrcc4*<sup>-/-</sup> mouse ES cells was examined by Western blotting and is shown under the chart.  $\beta$ -actin serves as a loading control.

## Supplementary Figure 4

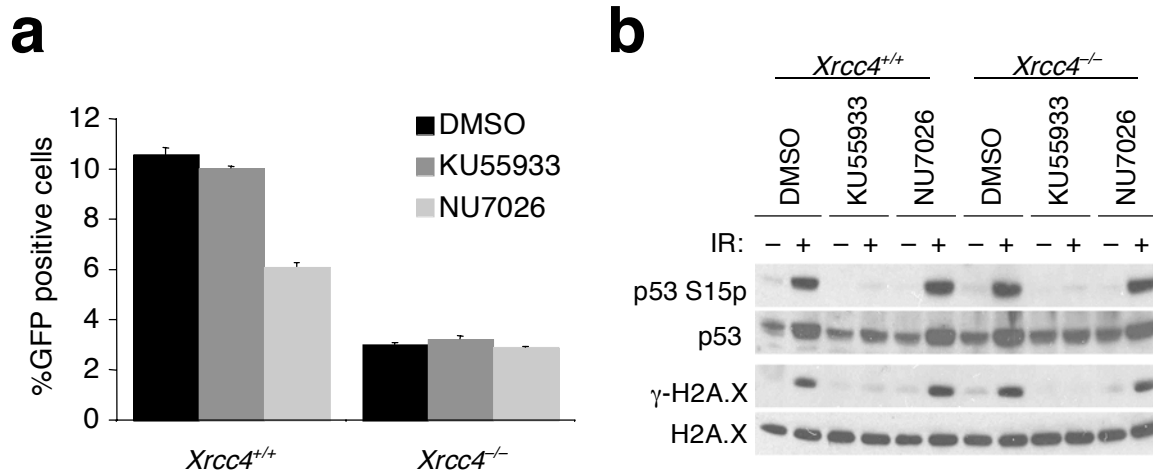

**Supplementary Figure 4** Atm inhibition has no effect on either *Xrcc4*-dependent NHEJ or *Xrcc4*-independent NHEJ. **(a)** Percentage of I-SceI-induced GFP<sup>+</sup> cells from *Xrcc4*<sup>+/+</sup> and *Xrcc4*<sup>-/-</sup> sGEJ reporter mouse ES cells treated with Atm inhibitor KU55933 and DNA-PKcs inhibitor NU7026. Bars represent mean of triplicates. Error bars indicate s.e.m. Student's paired *t*-test (two-tailed): in *Xrcc4*<sup>+/+</sup> cells, DMSO versus NU7026,  $P = 0.002$ ; in *Xrcc4*<sup>-/-</sup> cells, DMSO versus NU7026, not significant ( $P = 0.209$ ); in both cells, DMSO versus KU55933, not significant ( $P = 0.242$  and  $P = 0.309$  respectively). **(b)** Effect of KU55933 and NU7026 on phosphorylation of p53 Ser15 and H2A.X Ser139 in response to ionizing radiation (IR). *Xrcc4*<sup>+/+</sup> and *Xrcc4*<sup>-/-</sup> sGEJ reporter mouse ES cells were treated for 1 hr with DMSO, KU55933 (20  $\mu$ M) or NU7026 (40  $\mu$ M) followed by exposure to 5 Gy of IR. After 2 hrs, the cells were analyzed for p53 Ser15 phosphorylation (p53 S15p) and  $\gamma$ -H2A.X by Western blotting. Levels of p53 and H2A.X are shown as respective loading controls.

# Supplementary Figure 5

**a**

## NHEJ reporter sGEJ

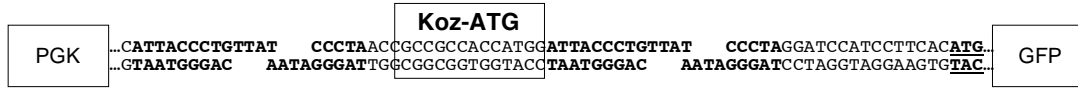

**b**

### *Xrcc4*<sup>+/+</sup>

siLuc

Accurate repair: 49 clones

CATTACCCCTGTTAT 0nt CCCTAGGATCCATCCTTCACATG both (x49)

Deletion+microhomology: 16 repair events

|                       |                               |                            |                      |
|-----------------------|-------------------------------|----------------------------|----------------------|
| GATTACCCCTGTT         | 1nt                           | TATCCCTAGGATCCATCCTTCACATG | 2 <sup>nd</sup>      |
| GATTACCCCTG           | 1nt                           | TATCCCTAGGATCCATCCTTCACATG | 2 <sup>nd</sup>      |
| GATTACCCCTGTTA        | 4nt                           | TAGGATCCATCCTTCACATG       | 2 <sup>nd</sup>      |
| GATTACCCCTG           | 7nt                           | TAGGATCCATCCTTCACATG       | 2 <sup>nd</sup> (x2) |
| CATTA                 | 9nt                           | CCCTAGGATCCATCCTTCACATG    | both (x3)            |
| TTA 9nt               | CCCTAACCGCCGCCACCATTGGGATTACC | 28nt TG                    | both/1 <sup>st</sup> |
| GATTA                 | 9nt                           | CCCTAGGATCCATCCTTCACATG    | 2 <sup>nd</sup>      |
| CATTACCCCTGTT         | 13nt                          | ATCCTTCACATG               | both (x2)            |
| GCCGCCA               | 20nt                          | CCCTAGGATCCATCCTTCACATG    | 2 <sup>nd</sup>      |
| GATTACCCCTGTT         | 25nt                          | ATCAGCAAGGGCGAGG           | 2 <sup>nd</sup>      |
| CATTACCCCTGTTATCCCTAA | 45nt                          | CACATG                     | 2 <sup>nd</sup> (x2) |

Deletion/no microhomology: 5 repair events

|             |                               |                         |                      |
|-------------|-------------------------------|-------------------------|----------------------|
| GATTACCCCTG | 4nt                           | CCCTAGGATCCATCCTTCACATG | 2 <sup>nd</sup> (x2) |
| CATTACCCCTG | 9nt                           | GGATCCATCCTTCACATG      | both                 |
| TTA 9nt     | CCCTAACCGCCGCCACCATTGGGATTACC | 28nt TG                 | both/2 <sup>nd</sup> |
| CCG         | 79nt                          | TAGGATCCATCCTTCACATG    | both                 |

Deletion+insertion: 0 clone

Total: 69 clones/70 repair events

siMre11

Accurate repair: 48 clones

CATTACCCCTGTTAT 0nt CCCTAGGATCCATCCTTCACATG both (x48)

Deletion+microhomology: 9 clones

|                 |      |                         |                      |
|-----------------|------|-------------------------|----------------------|
| GATTACCCCTGT    | 6nt  | TAGGATCCATCCTTCACATG    | 2 <sup>nd</sup>      |
| GATTACCCCTG     | 7nt  | TAGGATCCATCCTTCACATG    | 2 <sup>nd</sup> (x3) |
| GATTACCCCT      | 10nt | GGATCCATCCTTCACATG      | 2 <sup>nd</sup>      |
| CATTA           | 10nt | CCCTAGGATCCATCCTTCACATG | both                 |
| CCCTAACCGCCGCCA | 19nt | CCCTAGGATCCATCCTTCACATG | 2 <sup>nd</sup>      |
| GAATT           | 24nt | CATCCTTCACATG           | both                 |
| GCCAGCT         | 53nt | CTAGGATCCATCCTTCACATG   | both                 |

Deletion/no microhomology: 8 clones

|                  |      |                         |                      |
|------------------|------|-------------------------|----------------------|
| GATTACCCCTGTTA   | 1nt  | CCCTAGGATCCATCCTTCACATG | 2 <sup>nd</sup> (x2) |
| GCCGCCACCATTGGAT | 16nt | GGATCCATCCTTCACATG      | 2 <sup>nd</sup>      |
| GATTACCCCTG      | 4nt  | CCCTAGGATCCATCCTTCACATG | 2 <sup>nd</sup> (x5) |

Deletion+insertion: 1 clone

CCCTAACCGCC 41nt (29nt) ACATG 2<sup>nd</sup>

Total: 66 clones

**c**

### *Xrcc4*<sup>-/-</sup>

siLuc

Accurate repair: 5 clones

CATTACCCCTGTTAT 0nt CCCTAGGATCCATCCTTCACATG both (x5)

Deletion+microhomology: 35 clones

|                 |      |                           |                      |
|-----------------|------|---------------------------|----------------------|
| GATTACCCCTGTTAT | 1nt  | ATCCCTAGGATCCATCCTTCACATG | 2 <sup>nd</sup> (x2) |
| GATTACCCCTGT    | 6nt  | TAGGATCCATCCTTCACATG      | 2 <sup>nd</sup>      |
| GATTACCCCTG     | 7nt  | TAGGATCCATCCTTCACATG      | 2 <sup>nd</sup>      |
| CATTA           | 9nt  | CCCTAGGATCCATCCTTCACATG   | both (x2)            |
| GATTA           | 9nt  | CCCTAGGATCCATCCTTCACATG   | 2 <sup>nd</sup> (x2) |
| GATTA           | 10nt | CCCTAGGATCCATCCTTCACATG   | 2 <sup>nd</sup> (x6) |
| GATTACCCCT      | 10nt | GGATCCATCCTTCACATG        | 2 <sup>nd</sup> (x5) |
| CATTAC          | 17nt | CCATCCTTCACATG            | both                 |
| GCCGCCA         | 20nt | CCCTAGGATCCATCCTTCACATG   | 2 <sup>nd</sup> (x2) |
| ACCG            | 26nt | CCCTAGGATCCATCCTTCACATG   | 2 <sup>nd</sup>      |
| GCCGCCACCATTGGA | 26nt | TCACATG                   | 2 <sup>nd</sup>      |
| GCCGCCA         | 28nt | CCATCCTTCACATG            | 2 <sup>nd</sup> (x5) |
| CCCTAA          | 45nt | CACATG                    | 2 <sup>nd</sup>      |
| GCCCAAGCTCTAG   | 48nt | CCCTAGGATCCATCCTTCACATG   | both (x2)            |
| GCCCAAGC        | 51nt | TCCCTAGGATCCATCCTTCACATG  | both                 |
| CCTTTCGA        | 66nt | CCCTAGGATCCATCCTTCACATG   | both                 |

Deletion/no microhomology: 3 clones

|                |      |                         |                      |
|----------------|------|-------------------------|----------------------|
| GATTACCCCTGTTA | 1nt  | CCCTAGGATCCATCCTTCACATG | 2 <sup>nd</sup> (x2) |
| CATTACC        | 14nt | ATCCATCCTTCACATG        | both                 |

Deletion+insertion: 3 clones

|            |             |                           |                 |
|------------|-------------|---------------------------|-----------------|
| ATTACCCCTG | 2nt (1nt)   | ATCCCTAGGATCCATCCTTCACATG | 2 <sup>nd</sup> |
| CCCTAA     | 28nt (18nt) | CCCTAGGATCCATCCTTCACATG   | 2 <sup>nd</sup> |
| CCCTAA     | 28nt (8nt)  | CCCTAGGATCCATCCTTCACATG   | 2 <sup>nd</sup> |

Insertion: 3 clones

|                 |        |                           |                 |
|-----------------|--------|---------------------------|-----------------|
| GATTACCCCTGTT   | (2nt)  | ATCCCTAGGATCCATCCTTCACATG | 2 <sup>nd</sup> |
| CATTACCCCTGTTAT | (8nt)  | CCCTAGGATCCATCCTTCACATG   | both            |
| GATTACCCCTGTTAT | (29nt) | CCCTAGGATCCATCCTTCACATG   | 2 <sup>nd</sup> |

Total: 49 clones

siMre11

Accurate repair: 8 clones

CATTACCCCTGTTAT 0nt CCCTAGGATCCATCCTTCACATG both (x8)

Deletion+microhomology: 44 clones

|                 |      |                            |                      |
|-----------------|------|----------------------------|----------------------|
| GATTACCCCTGT    | 2nt  | CCCTAGGATCCATCCTTCACATG    | 2 <sup>nd</sup>      |
| CA              | 8nt  | TATCCCTAGGATCCATCCTTCACATG | both (x6)            |
| CATTA           | 9nt  | CCCTAGGATCCATCCTTCACATG    | both (x3)            |
| GATTA           | 9nt  | CCCTAGGATCCATCCTTCACATG    | 2 <sup>nd</sup> (x2) |
| GATTACCCCT      | 10nt | GGATCCATCCTTCACATG         | 2 <sup>nd</sup> (x7) |
| CATTACCCCT      | 10nt | GGATCCATCCTTCACATG         | both                 |
| GAT             | 10nt | TCCCTAGGATCCATCCTTCACATG   | 2 <sup>nd</sup> (x2) |
| GATTA           | 10nt | CCCTAGGATCCATCCTTCACATG    | 2 <sup>nd</sup> (x2) |
| GATTACCCCTGTT   | 13nt | ATCCTTCACATG               | 2 <sup>nd</sup> (x6) |
| CATTACCCCTGTTAT | 19nt | CATG                       | 2 <sup>nd</sup>      |
| GCCGCCA         | 19nt | CCCTAGGATCCATCCTTCACATG    | 2 <sup>nd</sup>      |
| GCCGCCA         | 20nt | CCCTAGGATCCATCCTTCACATG    | 2 <sup>nd</sup>      |
| ACCGCCG         | 23nt | CCCTAGGATCCATCCTTCACATG    | 2 <sup>nd</sup> (x2) |
| GATTACCCCTGTT   | 25nt | ATG                        | 2 <sup>nd</sup>      |
| GCCGCCA         | 28nt | CCATCCTTCACATG             | 2 <sup>nd</sup> (x3) |
| AAGCTTCGAA      | 31nt | TCACATG                    | both                 |
| ACCGCCGCCAC     | 37nt | CATG                       | 2 <sup>nd</sup>      |
| ACCG            | 38nt | CCCTTCACATG                | 2 <sup>nd</sup> (x2) |
| GCCCAAGCTCTAG   | 47nt | CCCTAGGATCCATCCTTCACATG    | both                 |

Deletion/no microhomology: 6 clones

|                 |      |                         |                      |
|-----------------|------|-------------------------|----------------------|
| GATTACCCCTGTTA  | 1nt  | CCCTAGGATCCATCCTTCACATG | 2 <sup>nd</sup> (x5) |
| GCCGCCACCATTGGA | 16nt | AGGATCCATCCTTCACATG     | 2 <sup>nd</sup>      |

Deletion+insertion: 3 clones

|                      |            |                           |                 |
|----------------------|------------|---------------------------|-----------------|
| ATTACCCCT            | 5nt (17nt) | ATCCCTAGGATCCATCCTTCACATG | 2 <sup>nd</sup> |
| GCCGCCACCATTGGATTACC | 35nt (4nt) | (ATGATCAG)C               | 2 <sup>nd</sup> |
| TCTCGAGCTCCT         | 38nt (2nt) | TCCTTCACATG               | both            |

Insertion: 3 clones

|                        |       |                            |                 |
|------------------------|-------|----------------------------|-----------------|
| GATTACCCCTG            | (2nt) | TATCCCTAGGATCCATCCTTCACATG | 2 <sup>nd</sup> |
| GATTACCCCTGTTATCCCTAGG | (8nt) | ATCCATCCTTCACATG           | 2 <sup>nd</sup> |
| GATTACCCCTGTTAT        | (5nt) | CCCTAGGATCCATCCTTCACATG    | 2 <sup>nd</sup> |

Total: 64 clones

**Supplementary Figure 5** Analysis of repair junctions in cells lacking *Xrcc4* and cells depleted of Mre11. (a) Junction sequence of the NHEJ reporter sGEJ. The two I-SceI sites are in bold. Start codon of *GFP* ORF is in bold and underlined. The *PGK* (*phosphoglycerate kinase*) promoter and the *GFP* cDNA are indicated. (b, c) Junction sequences of I-SceI-induced GFP<sup>+</sup> repair products from *Xrcc4*<sup>+/+</sup> cells (b) and *Xrcc4*<sup>-/-</sup> cells (c) depleted of Mre11 by siMre11 in comparison with siLuc. Repair events are categorized as indicated. Tracts of microhomology are in bold and underlined. The number of deleted nucleotides is indicated in each repair event. Locations of I-SceI cutting within the NHEJ reporter are also shown followed by the number of identical repair junctions in parentheses.

**Supplementary Figure 6**

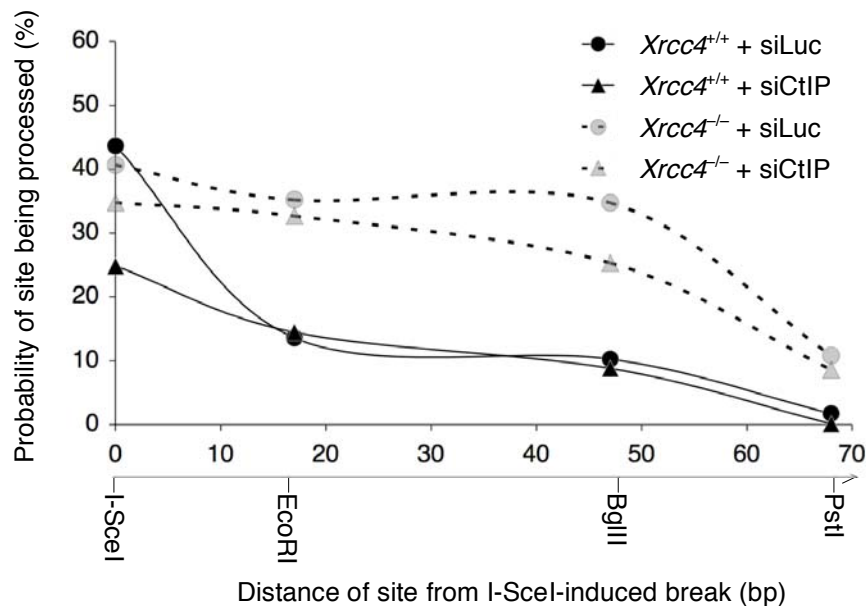

**Supplementary Figure 6** Effect of CtIP depletion on NHEJ-associated end processing. DNA bands in the Southern blot shown in **Figure 2b** were quantified by phosphorimager and densitometry. The probability of the restriction site being processed is calculated as the intensity of the “uncut” band divided by the combined intensities of “cut” and “uncut” bands (expressed as a percentage). The probability is plotted against the distance of each site from the I-SceI-induced break indicated along the x-axis.

## Supplementary Figure 7

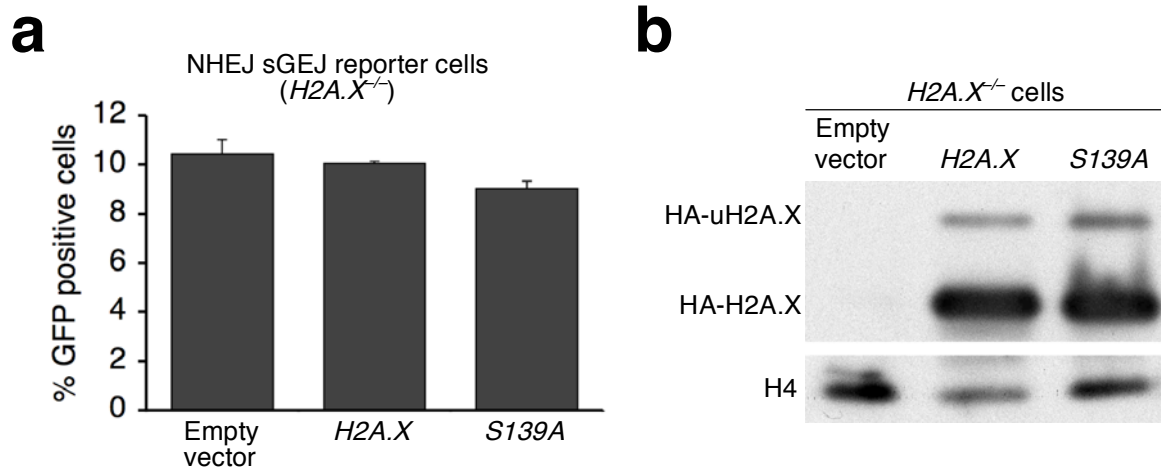

**Supplementary Figure 7** Expression of wild-type  $H2A.X$  has no effect on NHEJ in  $H2A.X^{-/-}$  cells. **(a)** Percentage of I-SceI-induced GFP<sup>+</sup> cells in  $H2A.X^{-/-}$  sGEJ reporter mouse ES cells transiently expressing either empty vector, HA-tagged wild-type  $H2A.X$  or  $S139A$  mutant alleles. Bars represent mean of triplicates. Error bars indicate s.e.m. Student's paired  $t$ -test between empty vector *versus* other samples, not significant (*versus* wild-type  $H2A.X$ ,  $P = 0.577$ ; *versus*  $S139A$ ,  $P = 0.204$ ). **(b)** Steady state levels of HA-tagged  $H2A.X$  and its  $S139A$  mutant proteins expressed in the  $H2A.X^{-/-}$  sGEJ reporter mouse ES cells. HA-tagged  $H2A.X$  and mono-ubiquitinated HA-tagged  $H2A.X$  (HA-u $H2A.X$ ), as well as histone H4 as a loading control, are indicated.

**Supplementary Table 1** I-SceI cutting in I-SceI-induced NHEJ products

|                      | Number of repair events     |         |                             |         | Percentage of all NHEJ events (%) |         |                             |         |
|----------------------|-----------------------------|---------|-----------------------------|---------|-----------------------------------|---------|-----------------------------|---------|
|                      | <i>Xrcc4</i> <sup>+/+</sup> |         | <i>Xrcc4</i> <sup>-/-</sup> |         | <i>Xrcc4</i> <sup>+/+</sup>       |         | <i>Xrcc4</i> <sup>-/-</sup> |         |
| I-SceI cutting       | siLuc                       | siMre11 | siLuc                       | siMre11 | siLuc                             | siMre11 | siLuc                       | siMre11 |
| both+Kozak popout    | 57                          | 51      | 14                          | 22      | 82.6                              | 77.3    | 28.6                        | 34.4    |
| both+no Kozak popout | 1                           | -       | -                           | -       | 1.4                               | -       | -                           | -       |
| 1st I-SceI site only | -                           | -       | -                           | -       | -                                 | -       | -                           | -       |
| 2nd I-SceI site only | 11                          | 15      | 35                          | 42      | 15.9                              | 22.7    | 71.4                        | 65.6    |
| Total sequences      | 69                          | 66      | 49                          | 64      | 100.0                             | 100.0   | 100.0                       | 100.0   |
